# Supplementary material
Source: PubMed Central journal article supplement (PMC7387152)

# Figure S11

5/1/19=D1 KPfloxC-Luc (KP-/-C-GFP-luc) Panel 38

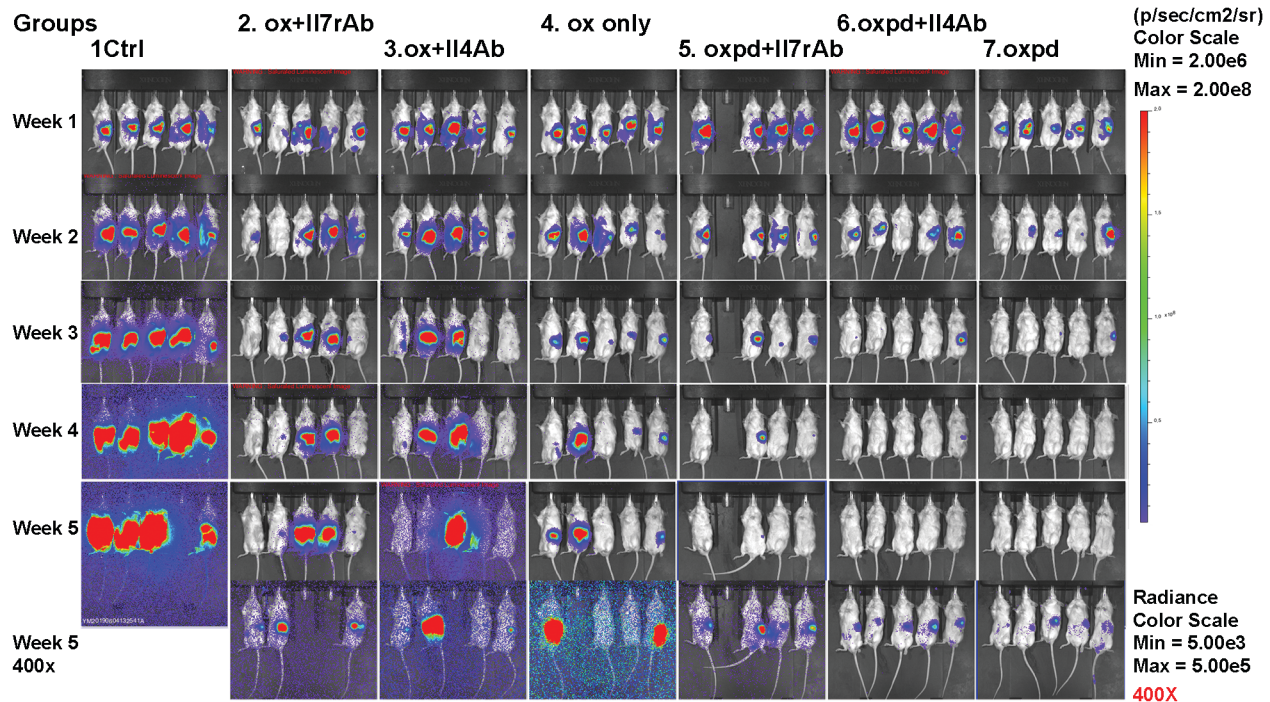

Supplement: NIHMS1576513-supplement-12.pdf [file NIHMS1576513-supplement-12.pdf]

Figure S12

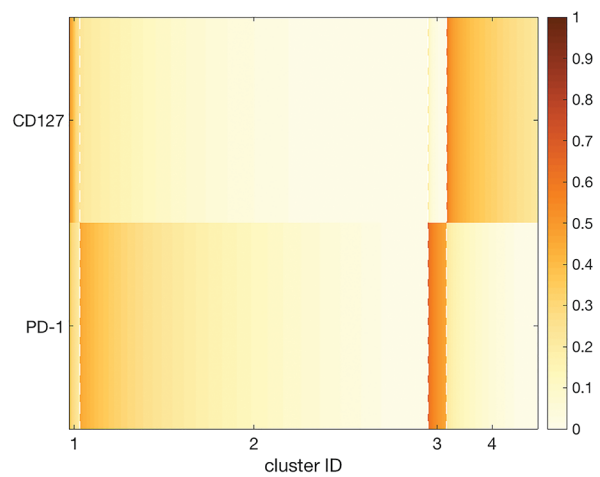

Supplement: NIHMS1576513-supplement-13.pdf [file NIHMS1576513-supplement-13.pdf]

Figure S1

3/29/14=D1 Panc02-Luc Panel 6th

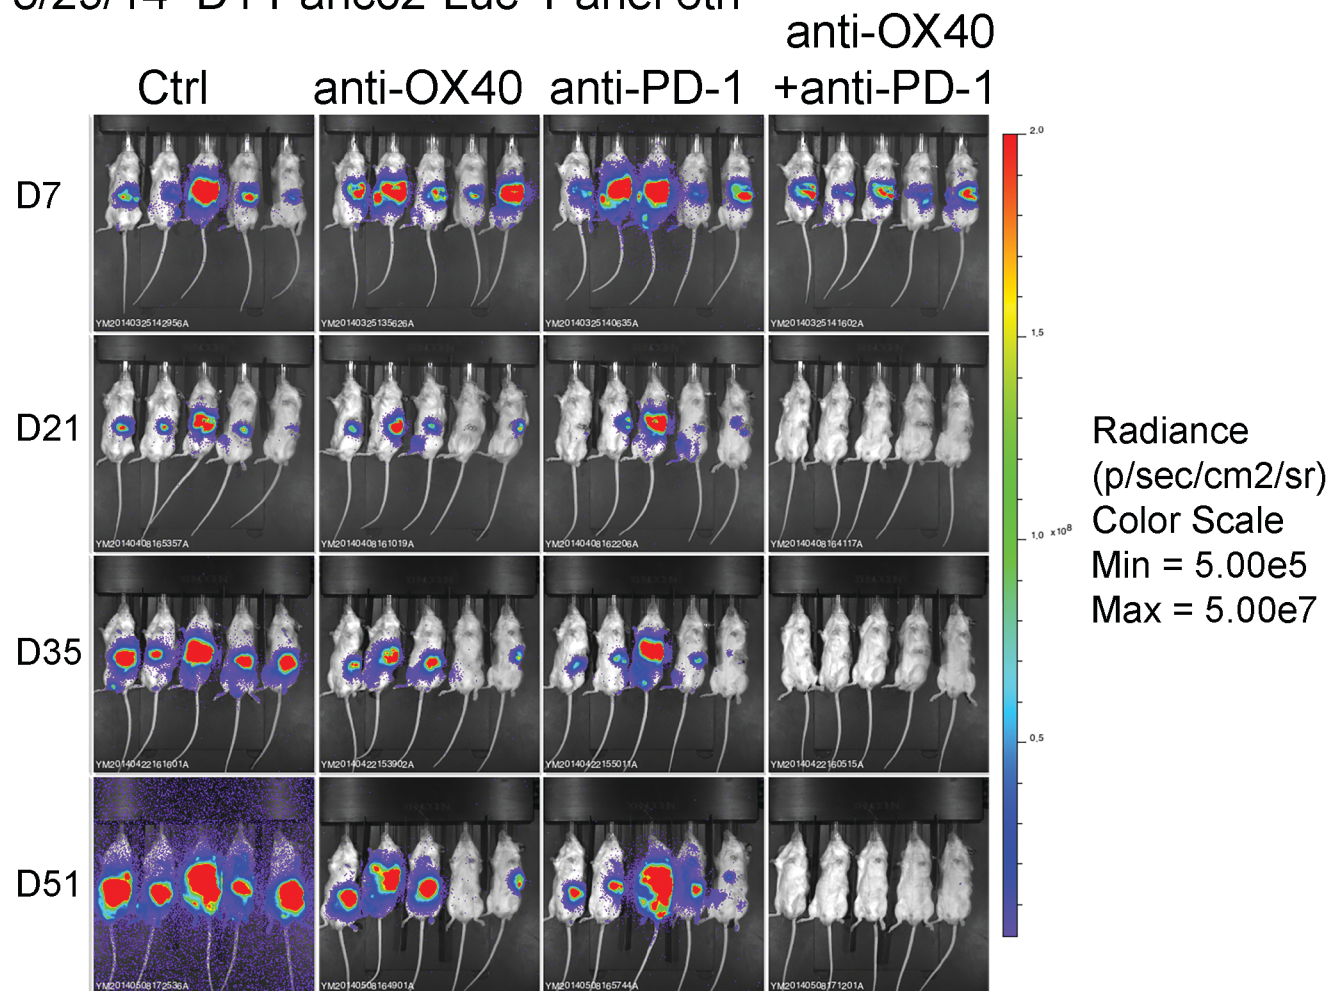

Supplement: NIHMS1576513-supplement-3.pdf [file NIHMS1576513-supplement-3.pdf]

Figure S3

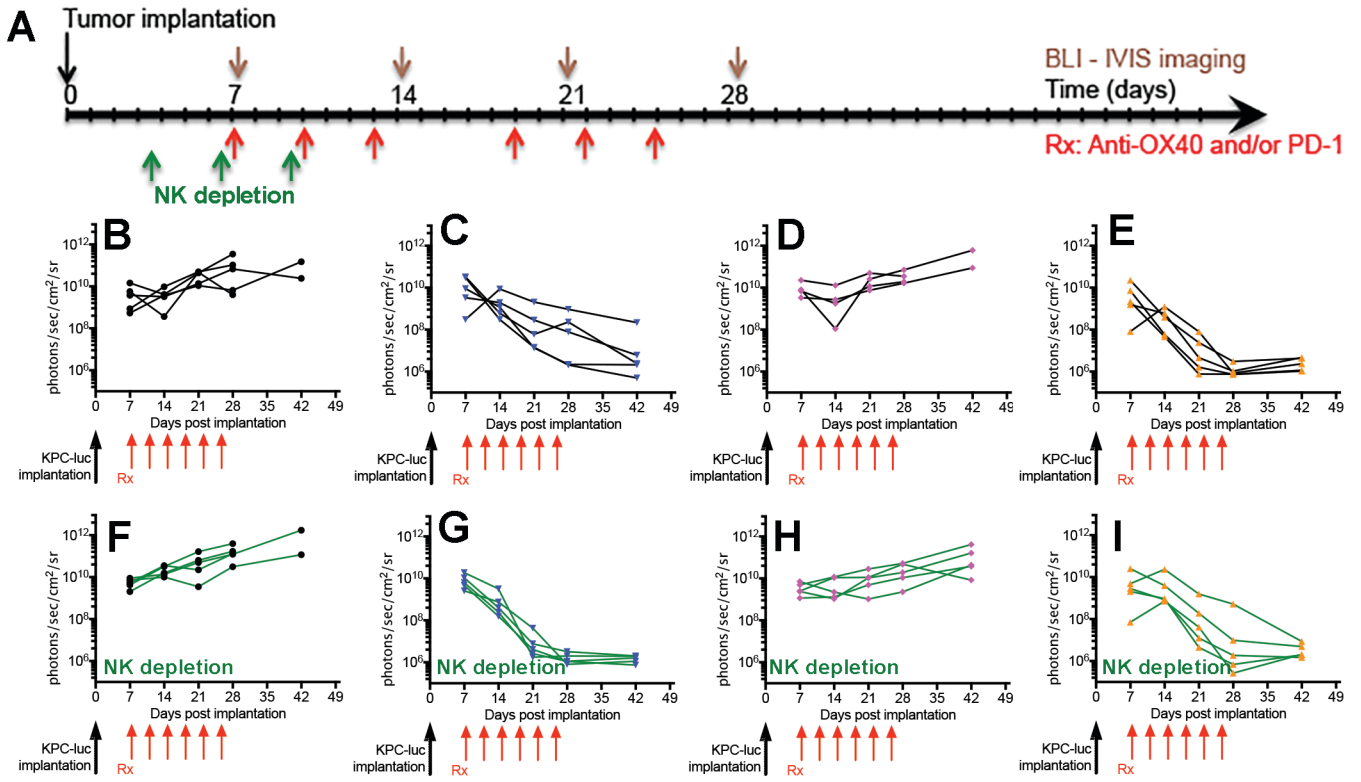

Supplement: NIHMS1576513-supplement-4.pdf [file NIHMS1576513-supplement-4.pdf]

# Figure S4

6/12/19=D1 mT4-Lyt2-Luc lo Panel 40

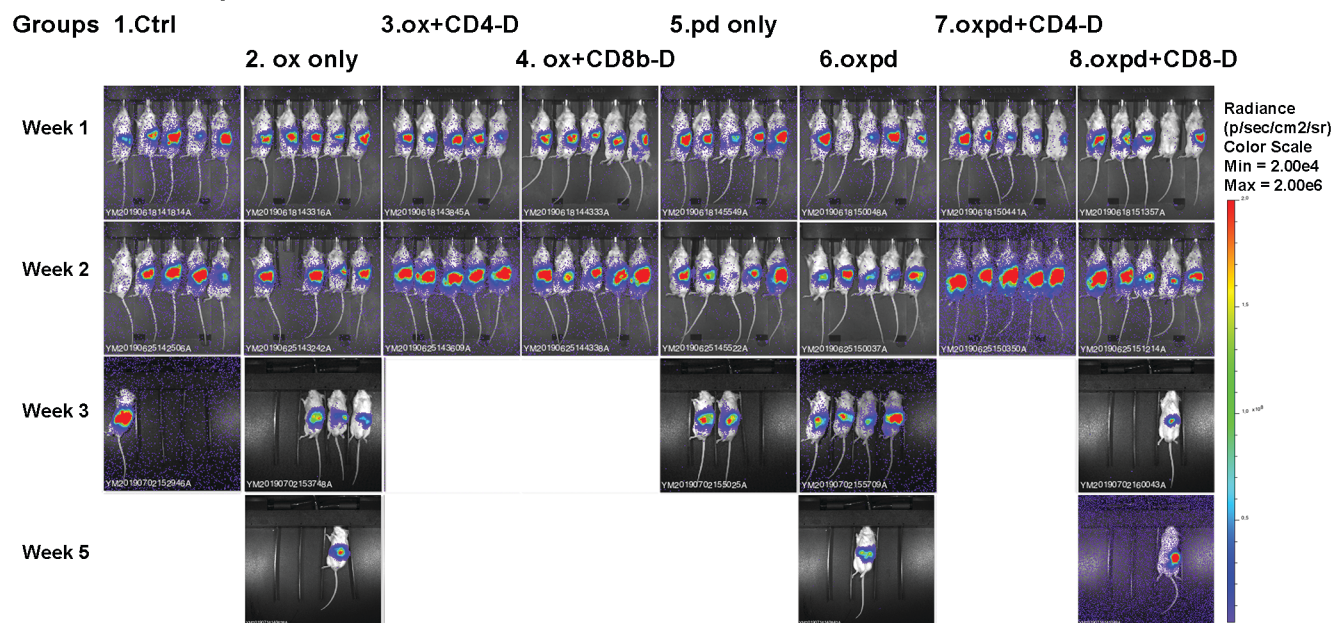

Supplement: NIHMS1576513-supplement-5.pdf [file NIHMS1576513-supplement-5.pdf]

# Figure S5

11/16/19=D200 KP-/-C-Luc Panel 49 CD4 or CD8 memory

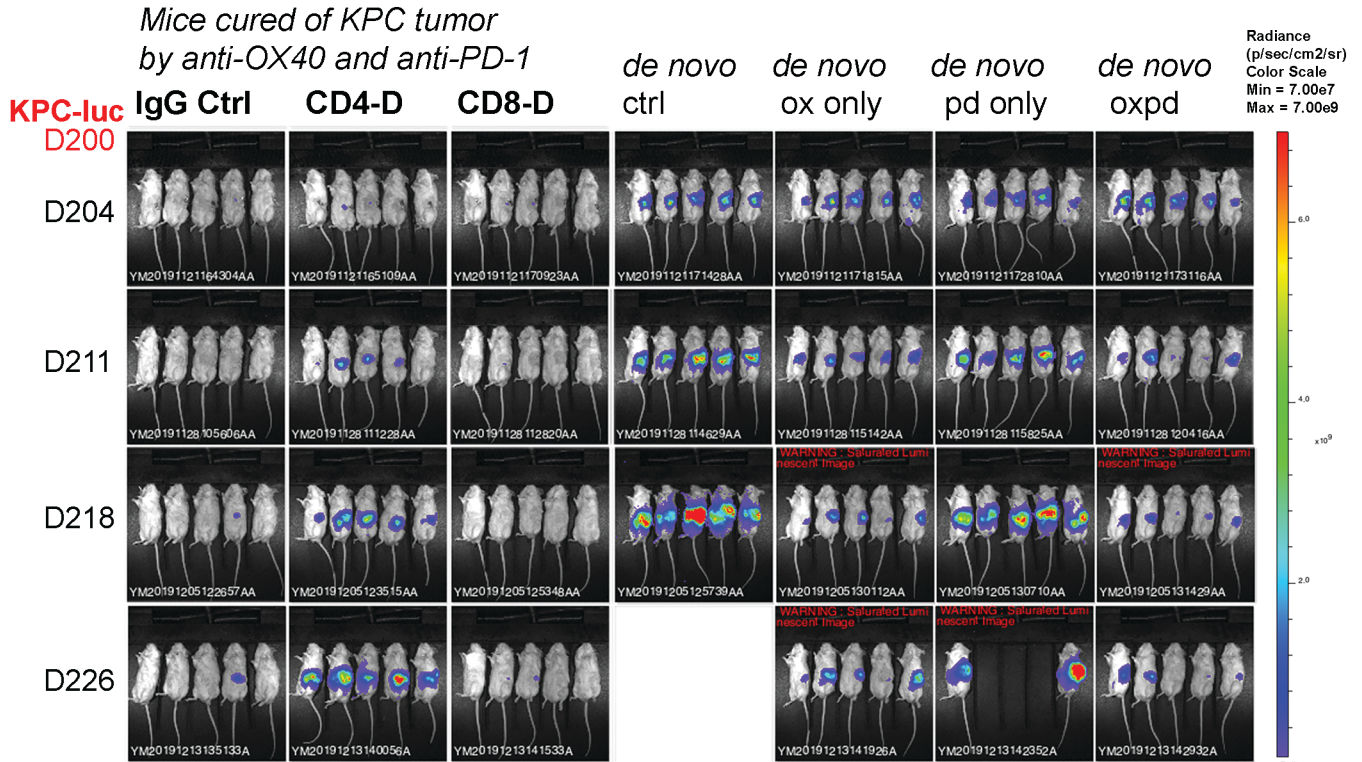

Supplement: NIHMS1576513-supplement-6.pdf [file NIHMS1576513-supplement-6.pdf]

# Figure S6

## 11/8/19=D1 KP-/-C-Luc Panel 48 Rag Baseline

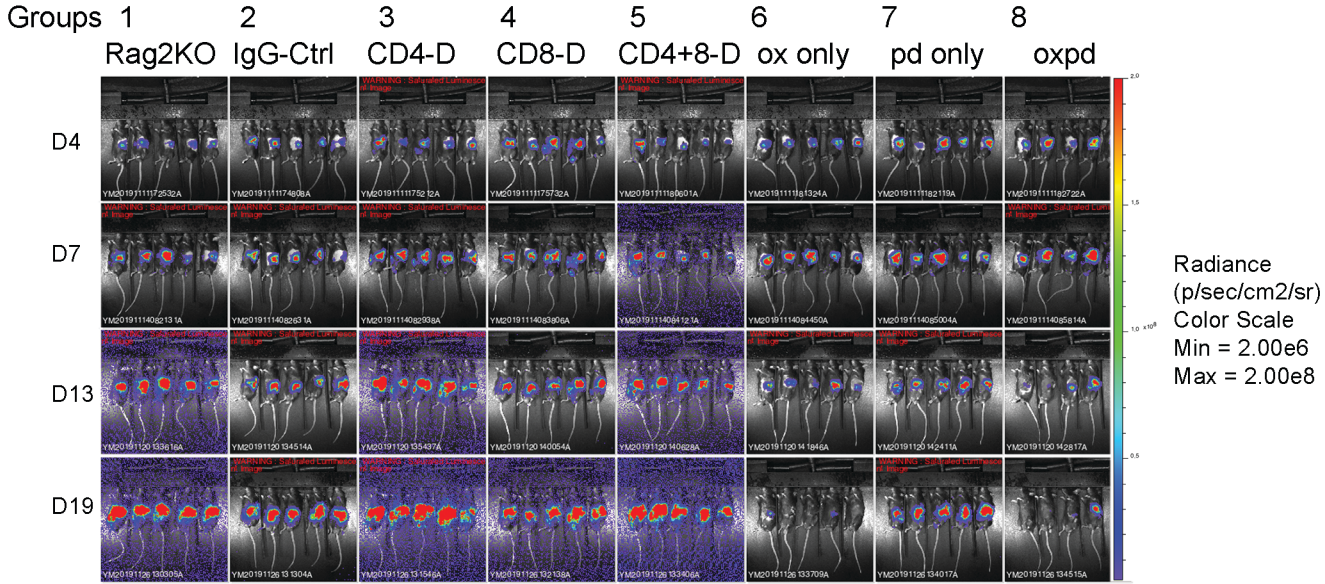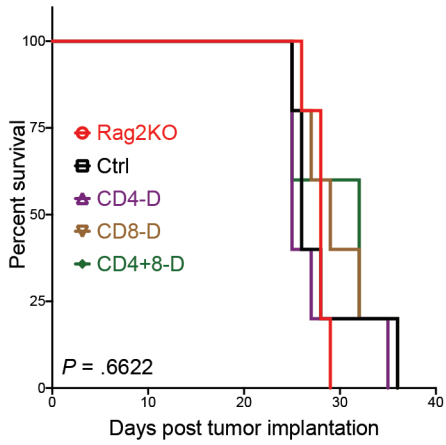

Supplement: NIHMS1576513-supplement-7.pdf [file NIHMS1576513-supplement-7.pdf]
